# Supplementary material for: Roles of distal aspartate and arginine of B-class dye-decolorizing peroxidase in heterolytic hydrogen peroxide cleavage
Source: PubMed Central journal article supplement (PMC6153280; doi:10.1074/jbc.ra118.004773), 2018-08-02
Supplement: supp_RA118.004773_139280_1_supp_173712_pcgrl4.pdf [file supp_RA118.004773_139280_1_supp_173712_pcgrl4.pdf]

## Supporting Information

Roles of distal aspartate and arginine of B-class dye-decolorizing peroxidase in heterolytic hydrogen peroxide cleavage

**Vera Pfanzagl<sup>1</sup>, Kevin Nys<sup>2</sup>, Marzia Bellei<sup>3</sup>, Hanna Michlits<sup>1</sup>, Georg Mlynek<sup>4</sup>, Gianantonio Battistuzzi<sup>5</sup>, Kristina Djinovic-Carugo<sup>4</sup>, Sabine Van Doorslaer<sup>2</sup>, Paul G. Furtmüller<sup>1</sup>, Stefan Hofbauer<sup>1</sup>, and Christian Obinger<sup>1\*</sup>**

From the <sup>1</sup>Department of Chemistry, Division of Biochemistry, BOKU - University of Natural Resources and Life Sciences, 1190 Vienna, Austria; <sup>2</sup>Department of Physics, University of Antwerp, Antwerp, Belgium; <sup>3</sup>Department of Life Sciences, University of Modena and Reggio Emilia, via Campi 103, 41125 Modena, Italy; <sup>4</sup>Department for Structural and Computational Biology, Max F. Perutz Laboratories, University of Vienna, 1030 Vienna, Austria; <sup>5</sup>Department of Chemistry and Geology, University of Modena and Reggio Emilia, 41125 Modena, Italy

Running title: *Mechanism of Compound I formation in KpDyP*

\*To whom correspondence should be addressed: Christian Obinger: Department of Chemistry, Division of Biochemistry, BOKU - University of Natural Resources and Life Sciences, 1190 Vienna, Austria; [christian.obinger@boku.ac.at](mailto:christian.obinger@boku.ac.at); Tel. +43-1-47654-77273; Fax. +43-1-47654-77259.

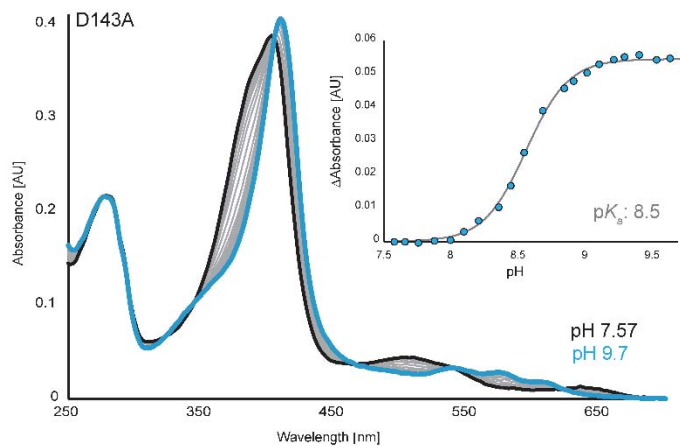

**Figure S1. Alkaline transition of the D143A variant.** The transition from high-spin ferric heme to hydroxo-ligated ferric heme of D143A was recorded between 250 and 700 nm at 25 °C. The mutant was prepared in 1 mL 50 mM phosphate buffer, pH 7.6, at a concentration of 5  $\mu$ M. The pH was increased by adding small amounts of 1 M KOH. The pH was determined by adding equal amounts to a reference sample and measuring the pH using a WTW Inolab pH 720 pH electrode. The  $pK_a$  was determined from the inversion point of a sigmoidal fit of the differential absorbance at 410 nm using Sigma Plot [equation:  $f = a/(1+\exp(-(x-x_0)/b))$ ].

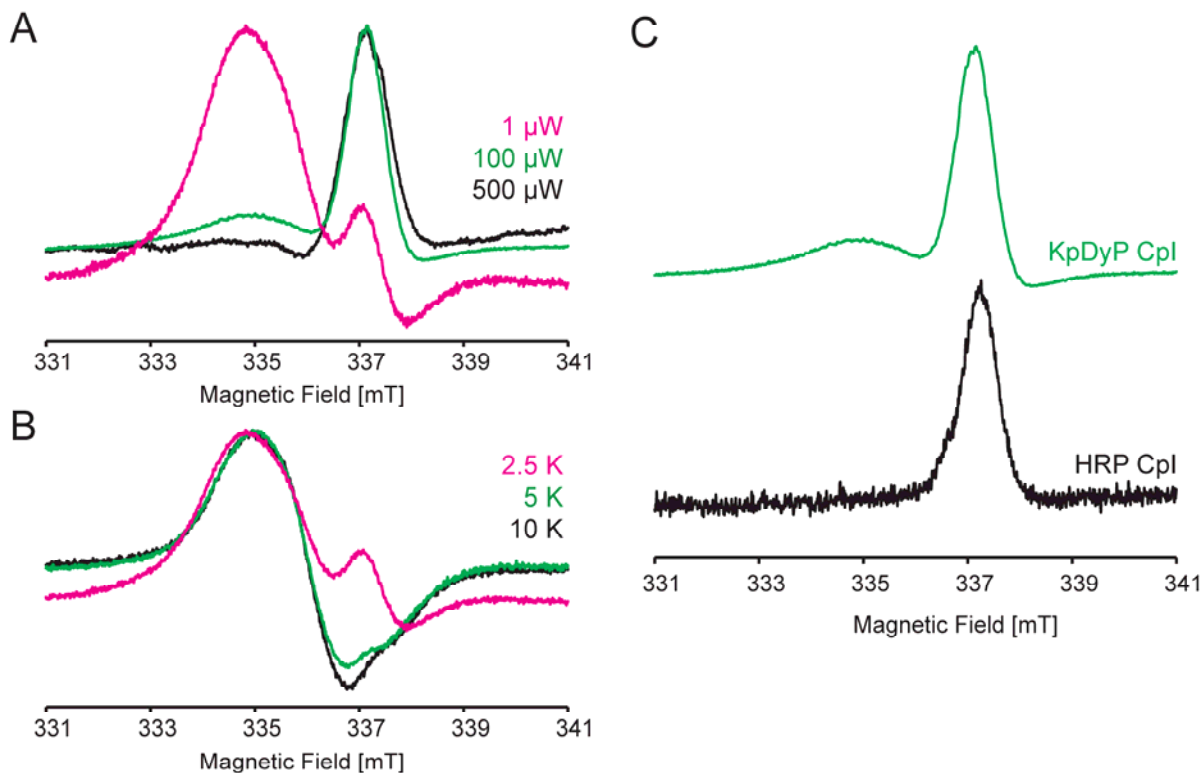

**Figure S2. CW EPR radical signatures of Compound I state of wild-type *KpDyP* and HRP.**

(A) Temperature dependence of X-band CW-EPR spectra (radical-type signal area) of the Compound I state of wild-type *KpDyP* at 2.5 K. Microwave power was 1  $\mu\text{W}$  (magenta), 100  $\mu\text{W}$  (green) and 500  $\mu\text{W}$  (black), (B) X-band CW-EPR spectrum (radical-type signal area) of the Compound I state of wild-type *KpDyP* at a temperature of 2.5 K (magenta), 5 K (green) and 10 K (black), all recorded using a microwave power of 1  $\mu\text{W}$ , (C) X-band CW EPR (radical-type signal area) of wild-type *KpDyP* Compound I (green) and HRP Compound I (black) at 2.5 K. Microwave power was 200  $\mu\text{W}$  for HRP and 100  $\mu\text{W}$  for *KpDyP*. Compound I was formed in all cases by addition of a 5-fold stoichiometric excess of hydrogen peroxide.

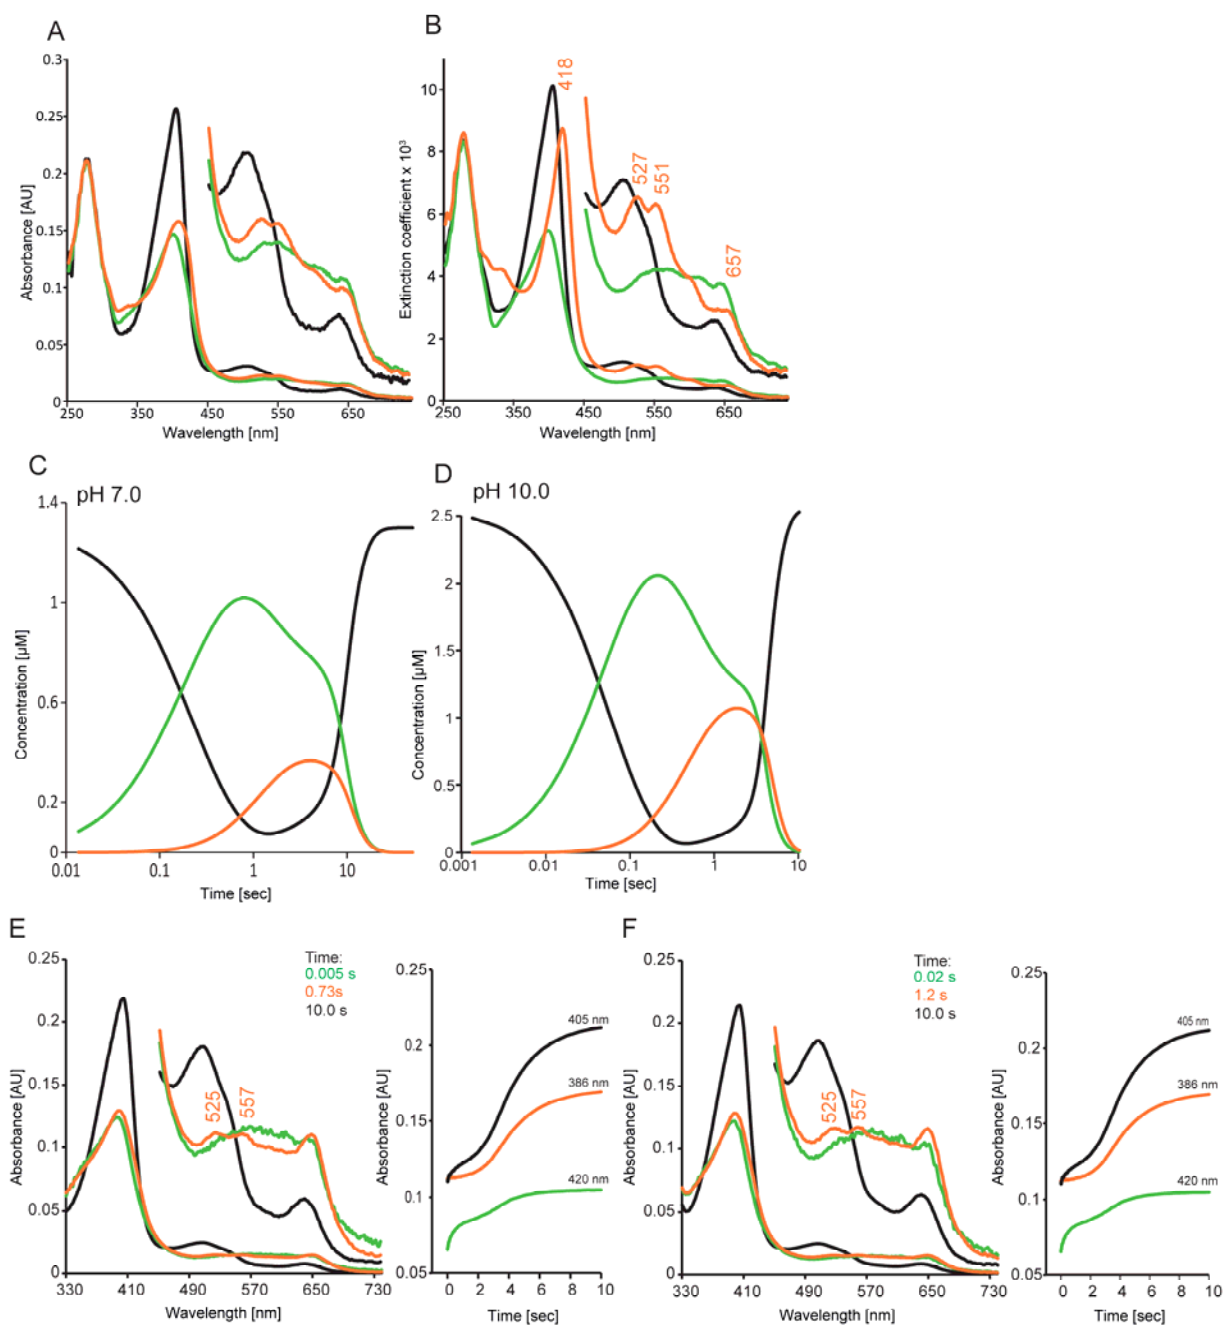

**Figure S3. Reaction of wild-type *KpDyP* Compound I with serotonin, TMB and ascorbate at pH 7.0 and pH 10.0.** Ferric spectra are shown in black, Compound I spectra in green and oxoiron(IV)-type Compound II spectra are shown in orange. (A) Reaction of wild-type *KpDyP* with hydrogen peroxide and serotonin (C) at pH 10.0 followed by the conventional stopped-flow mode. 4  $\mu\text{M}$  enzyme (in 5 mM phosphate buffer, pH 7.0) was mixed with a two-fold

stoichiometric excess of hydrogen peroxide and 50  $\mu\text{M}$  serotonin in 100 mM borate buffer, pH 10.0. (B) Simulated intermediate spectra using ProK and relevant absorption maxima. (C, D) simulated concentration profiles of the reaction of wild-type ferric *KpDyP* with serotonin and hydrogen peroxide at pH 7.0 (C) and pH 10.0 (D), calculated using ProK. The ferric enzyme is shown in black, the Compound I intermediate in green and the oxoiron(IV)-type Compound II in orange. (E, F) Reaction of wild-type Compound I with tetramethylbenzidine (TMB) (E) and ascorbate (F) at pH 7.0 followed by the sequential stopped-flow mode. Compound I (green spectrum) was preformed by mixing 6  $\mu\text{M}$  ferric *KpDyp* with 12  $\mu\text{M}$   $\text{H}_2\text{O}_2$  in 50 mM phosphate buffer, pH 7.0. After 100 ms delay time 20  $\mu\text{M}$  TMB and 200  $\mu\text{M}$  ascorbate (E) or 2 mM ascorbate (F) were added. Relevant absorption maxima and time points of selection of the spectra are depicted.

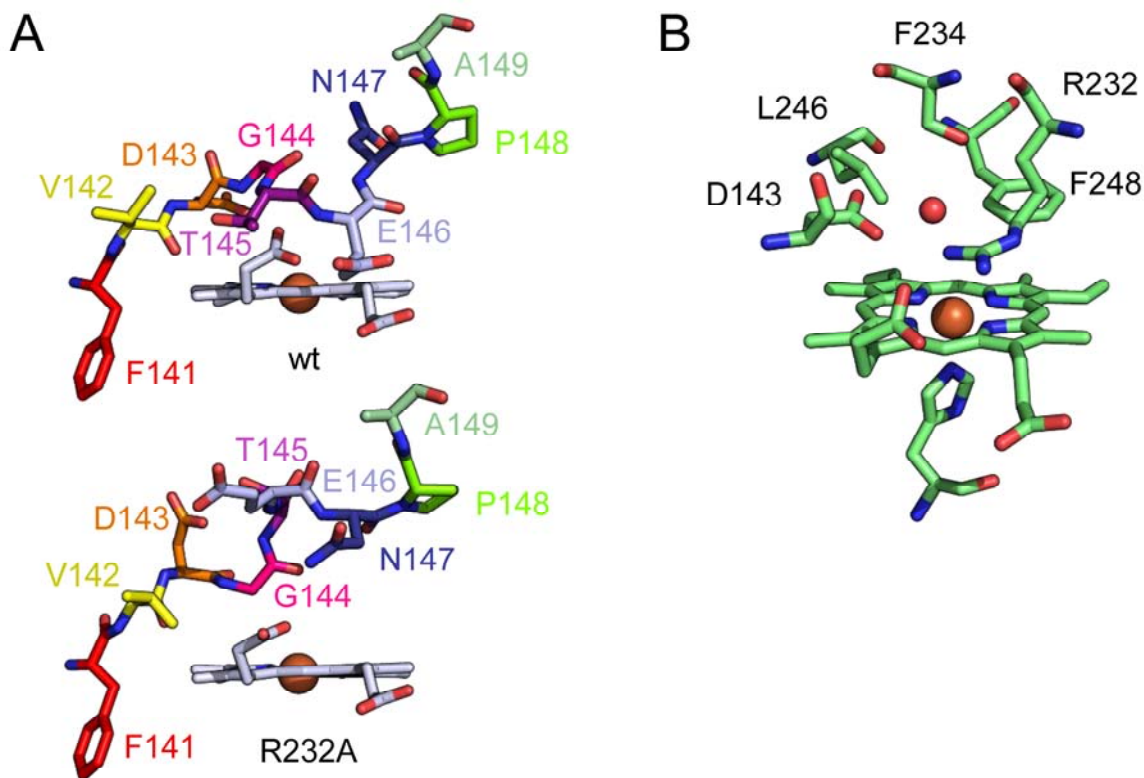

**Figure S4. Access channel of wild-type *KpDyP* and comparison of wild-type *KpDyP* and R232A residues 141-149.** (A) Comparison of residues 141 to 149 of wild-type *KpDyP* (top) and the R232A variant (bottom). All residues and the heme *b* cofactor are shown as sticks, the heme iron is shown as an orange sphere. All residues are labeled in the corresponding color. (B) Residues forming access channel 1 in wild-type *KpDyP*, all residues and the heme *b* cofactor are shown as green sticks, the distal water molecule W1 and the heme iron are shown as a red and orange sphere.

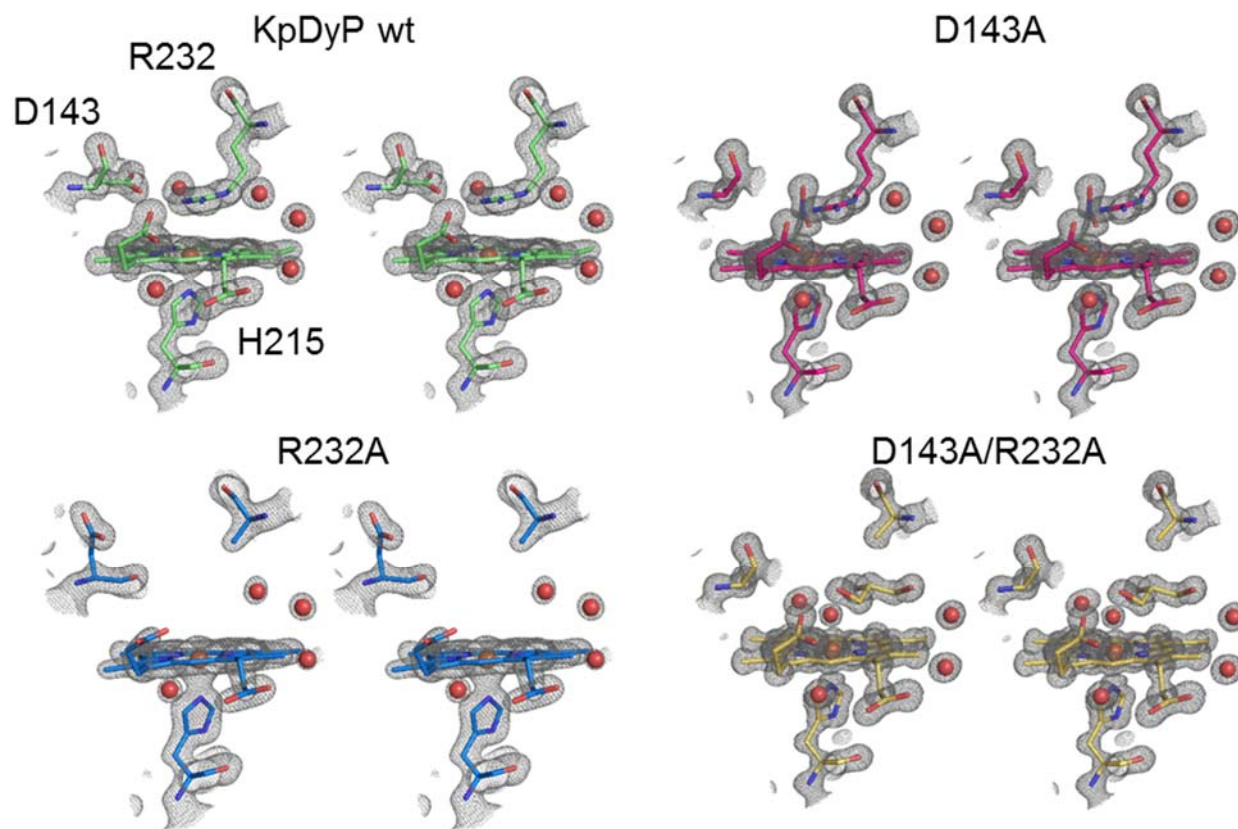

**Figure S5. Stereo view of the active site of comparison of wild-type *KpDyP* and variants with the  $2F_o-F_c$  electron density maps contoured at  $\sigma = 1.5$ .** All residues, the heme *b* cofactor and relevant distal small molecules (nitrite and glycerol) are shown as sticks. The relevant water molecules and the heme iron are shown as a red and orange sphere. The  $2F_o-F_c$  electron density maps were contoured at  $\sigma = 1.5$ , within 1.6 Å of the selected atoms using pymol.
